# Supplementary material for: Intra-individual alterations of serum markers routinely used in forensic pathology depending on increasing post-mortem interval
Source: PubMed Central journal article supplement (PMC6109050; doi:10.1038/s41598-018-31252-5), 2018-08-24
Supplement: 41598_2018_31252_MOESM1_ESM.pdf [file 41598_2018_31252_MOESM1_ESM.pdf]

# **Intra-individual alterations of serum markers routinely used in forensic pathology depending on increasing post-mortem interval**

Lina Woydt<sup>1,#</sup>, Michael Bernhard<sup>2,3,#</sup>, Holger Kirsten<sup>4,5</sup>, Ralph Burkhardt<sup>6</sup>, Niels Hammer<sup>7-9</sup>, André Gries<sup>2</sup>, Jan Dreßler<sup>1</sup>, Benjamin Ondruschka<sup>1,\*</sup>

<sup>1</sup> Institute of Legal Medicine, Medical Faculty University of Leipzig, Leipzig, Germany

<sup>2</sup> Emergency Department, University Hospital of Leipzig, Leipzig, Germany

<sup>3</sup> Emergency Department, Heinrich Heine University Duesseldorf, Duesseldorf, Germany

<sup>4</sup> Institute for Medical Informatics, Statistics and Epidemiology, University of Leipzig, Leipzig, Germany

<sup>5</sup> LIFE Research Center for Civilization Diseases, University of Leipzig, Leipzig, Germany

<sup>6</sup> Institute of Laboratory Medicine, Clinical Chemistry and Molecular Diagnostics, University of Leipzig, Leipzig, Germany

<sup>7</sup> Department of Anatomy, University of Otago, Dunedin, New Zealand

<sup>8</sup> Department of Orthopedic and Trauma Surgery, University Hospital of Leipzig, Leipzig, Germany

<sup>9</sup> Fraunhofer IWU, Dresden, Germany

# Both authors contributed equally to this work.

\* **Corresponding Author:** Dr. med. Benjamin Ondruschka  
Medical Faculty University of Leipzig  
Institute of Legal Medicine  
Johannisallee 28  
D-04103 Leipzig, Germany  
phone: +49 (0) 0341-9715152  
fax: +49 (0) 341-9715109  
mail: benjamin.ondruschka@medizin.uni-leipzig.de

**Electronic supplementary material**

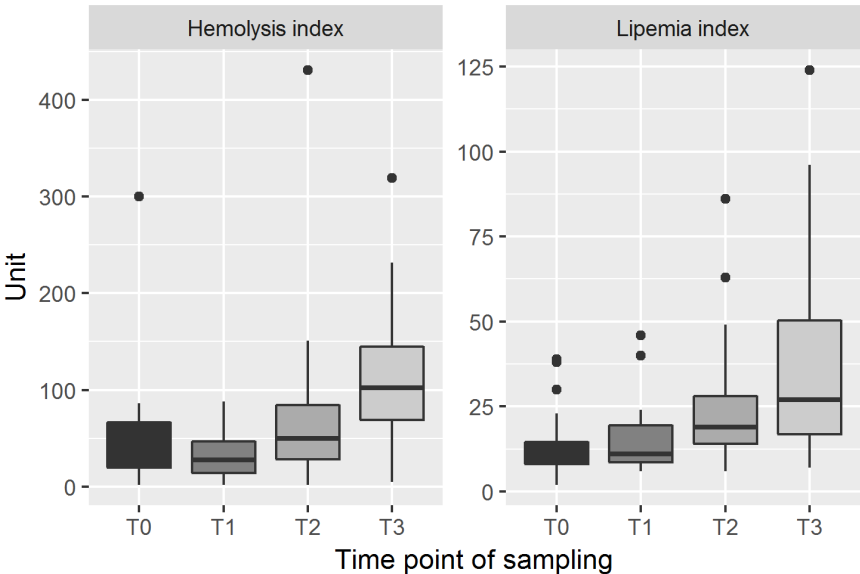

**Supplemental figure 1:** Changes of hemolysis index (left) and lipemia index (right) according to the different sampling time points reflecting increasing post-mortem interval.

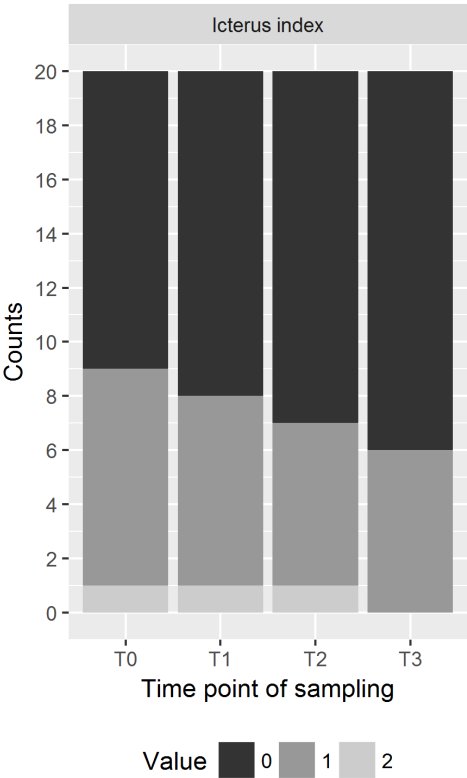

**Supplemental figure 2:** Minute changes of icterus index according to the different time points of sampling reflecting increasing post-mortem interval.

| Marker                             | Upper clinical reference | Post-mortem cut-off values |                              |
|------------------------------------|--------------------------|----------------------------|------------------------------|
|                                    |                          | Value                      | Citation                     |
| Creatinine (in $\mu\text{mol/l}$ ) | 104                      | 353.6                      | Kernbach-Wighton [26]        |
| Urea (in $\text{mmol/l}$ )         | 8.3                      | 33.4                       | Kernbach-Wighton [26]        |
| 3HB (in $\mu\text{mol/l}$ )        | 74                       | 500                        | Iten & Meier [27]            |
| Tryptase (in $\mu\text{g/l}$ )     | 11.4                     | 44.3                       | Edston et al. [28]           |
| Myoglobin (in $\mu\text{g/l}$ )    | 72                       | <i>not reported</i>        | <i>not available</i>         |
| Troponin T (in $\text{pg/ml}$ )    | 14                       | 250                        | Gonzalez-Herrera et al. [29] |
| CK (in $\mu\text{kat/l}$ )         | 2.9                      | <i>not reported</i>        | <i>not available</i>         |
| CK-MB (in $\mu\text{kat/l}$ )      | 0.4                      | <i>not reported</i>        | <i>not available</i>         |

**Supplemental table 1:** Comparison between upper clinical reference values presented by the manufacturer (Roche Diagnostics, Mannheim, Germany) and post-mortem threshold values, linked to one main reference.

| Quality control                  | Creatinine | Urea   | 3HB    | Tryptase | Myoglobin | Troponin T | CK     | CK-MB  |
|----------------------------------|------------|--------|--------|----------|-----------|------------|--------|--------|
| <b>Freeze-thaw stability</b>     |            |        |        |          |           |            |        |        |
| Upper range                      | +28.8%     | +25.8% | +17.6% | +21.1%   | +6.4%     | +13.9%     | +51.8% | +16.9% |
| Lower range                      | -8.8%      | -13.3% | -17.9% | -45.2%   | -51.0%    | -54.9%     | -8.0%  | -9.7%  |
| <b>Triplicate</b>                |            |        |        |          |           |            |        |        |
| Upper range                      | +1.3%      | +0.3%  | +4.4%  | +5.5%    | +5.3%     | +1.1%      | +2.4%  | +2.6%  |
| Lower range                      | -2.5%      | 0.0%   | -3.2%  | -7.3%    | -2.3%     | -6.5%      | -3.4%  | -2.6%  |
| <b>Arterial-venous deviation</b> |            |        |        |          |           |            |        |        |
| Maximum relative                 | 9.1%       | 2.8%   | 11.3%  | 1.7%     | 27.3%     | 18.3%      | 14.3%  | 1.9%   |

**Supplemental table 2:** Numerical details of quality control checks.
